# Supplementary material for: HAHap: a read-based haplotyping method using hierarchical assembly
Source: PeerJ. 2018 Oct 30;6:e5852. doi: 10.7717/peerj.5852 (PMC6214236; doi:10.7717/peerj.5852)
Supplement: Supplemental Information 1 [file peerj-06-5852-s001.xlsx]

## Sheet: Table-S1
	Evaulation on all
	HAHap	-10	10-20	20-30	30-40	40-50	50-100	100-200	200-300	300-400	400-500	>500	All	bin > 20
	NA24385	415255	10812	2370	917	370	469	85	11	2	4	0	430295	4228
	NA24149	408293	10241	2328	853	393	462	67	5	1	0	1	422644	4110
	NA24143	416675	11093	2543	923	406	472	81	11	4	4	2	432214	4446
	Total Case	1240223	32146	7241	2693	1169	1403	233	27	7	8	3	1285153	12784
	Perfect Case	1233610	31459	7006	2577	1113	1281	182	18	5	6	3	1277260	12191
	Perfect ratio (%)	0.994668	0.978629	0.967546	0.956925	0.952096	0.913043	0.781116	0.666667	0.714286	0.75	1	0.993858	0.953614
	NA24385	955512	151913	58373	31988	16614	30839	11376	2480	618	1775	0	1261488	154063
	NA24149	934769	143775	57316	29614	17592	30558	8926	1116	343	0	1086	1225095	146551
	NA24143	966787	155861	62279	32230	18228	31039	10749	2725	1332	1844	1502	1284576	161928
	Number of phased	2857068	451549	177968	93832	52434	92436	31051	6321	2293	3619	2588	3771159	462542
	Phased error	6760	830	332	192	92	227	133	35	41	4	0	8646	1056
	Unknown joined	174	23	13	9	5	8	7	1	0	0	0	240	43
	Phased error rate (%)	0.00241331	0.00185805	0.00185427	0.00197161	0.00165923	0.00249903	0.00405784	0.0053789	0.0165722	0.00110528	0	0.00229266	0.00228304
	Whatshap	-10	10-20	20-30	30-40	40-50	50-100	100-200	200-300	300-400	400-500	>500	All	bin > 20
	NA24385	414650	10790	2369	928	374	480	81	14	5	3	1	429695	4255
	NA24149	407693	10235	2320	846	418	466	74	1	2	3	1	422059	4131
	NA24143	415994	11089	2525	929	415	491	82	12	3	5	3	431548	4465
	Total Case	1238337	32114	7214	2703	1207	1437	237	27	10	11	5	1283302	12851
	Perfect Case	1229642	30993	6791	2466	1066	1208	156	13	5	5	2	1272347	11712
	Perfect ratio (%)	0.992978	0.965093	0.941364	0.91232	0.883181	0.84064	0.658228	0.481481	0.5	0.454545	0.4	0.991463	0.911369
	NA24385	953979	151734	58370	32401	16775	31505	10781	3353	1756	1329	678	1262661	156948
	NA24149	933272	143758	57101	29436	18733	30750	9898	234	674	1357	1086	1226299	149269
	NA24143	965079	155963	61852	32461	18669	32436	10780	2811	938	2253	2716	1285958	164916
	Number of phased	2852330	451455	177323	94298	54177	94691	31459	6398	3368	4939	4480	3774918	471133
	Phased error	8279	1278	561	399	248	592	280	162	64	79	20	11962	2405
	Unknown joined	1035	245	111	67	28	74	23	10	2	2	1	1598	318
	Phased error rate (%)	0.00290254	0.00283085	0.00316372	0.00423127	0.00457759	0.00625191	0.00890047	0.0253204	0.0190024	0.0159951	0.00446429	0.00316881	0.00510472
	HapCut2	-10	10-20	20-30	30-40	40-50	50-100	100-200	200-300	300-400	400-500	>500	All	bin > 20
	NA24385	415256	10814	2372	916	375	467	85	11	2	4	0	430302	4232
	NA24149	408241	10256	2329	844	393	465	67	5	1	0	1	422602	4105
	NA24143	416640	11105	2541	917	409	475	80	9	6	4	2	432188	4443
	Total Case	1240137	32175	7242	2677	1177	1407	232	25	9	8	3	1285092	12780
	Perfect Case	1233296	31436	6992	2546	1110	1274	173	16	5	6	3	1276857	12125
	Perfect ratio (%)	0.994484	0.977032	0.965479	0.951065	0.943076	0.905473	0.74569	0.64	0.555556	0.75	1	0.993592	0.948748
	NA24385	955448	151875	58390	31942	16833	30694	11376	2481	618	1775	0	1261432	154109
	NA24149	934616	143934	57348	29287	17593	30771	8986	1116	343	0	1086	1225080	146530
	NA24143	966590	155995	62246	32001	18358	31278	10601	2148	1947	1844	1502	1284510	161925
	Number of phased	2856654	451804	177984	93230	52784	92743	30963	5745	2908	3619	2588	3771022	462564
	Phased error	7093	963	388	212	136	308	204	57	75	4	0	9440	1384
	Unknown joined	173	23	13	9	5	8	7	1	0	0	0	239	43
	Phased error rate (%)	0.00248297	0.00213146	0.00217997	0.00227395	0.00257654	0.00332101	0.00658851	0.00992167	0.0257909	0.00110528	0	0.0025033	0.00299202
	The “unknown joined” means that the times of each tool joined separate phasing blocks (according to the answer sets) into a single block. We cannot tell if it is correct or not.
	Evaluation on each individual
	HAHAP (HG002)	-10	10-20	20-30	30-40	40-50	50-100	100-200	200-300	300-400	400-500	>500	All	bin > 20
	Total Case	415255	10812	2370	917	370	469	85	11	2	4	0	430295	4228
	Perfect Case	413187	10600	2294	882	356	434	61	8	2	3	0	427827	4040
	Perfect ratio (%)	0.99502	0.980392	0.967932	0.961832	0.962162	0.925373	0.717647	0.727273	1	0.75	None	0.994264	0.955535
	Number of phased	955512	151913	58373	31988	16614	30839	11376	2480	618	1775	0	1261488	154063
	Phased error	2092	254	107	51	25	81	66	9	0	3	0	2688	342
	Unknown joined	67	14	6	5	4	1	7	0	0	0	0	104	23
	Phased error rate (%)	0.00241331	0.00185805	0.00185427	0.00197161	0.00165923	0.00249903	0.00405784	0.0053789	0.0165722	0.00110528	0	0.00213082	0.00221987
	HAHAP (HG003)	-10	10-20	20-30	30-40	40-50	50-100	100-200	200-300	300-400	400-500	>500	All	bin > 20
	Total Case	408293	10241	2328	853	393	462	67	5	1	0	1	422644	4110
	Perfect Case	405987	10023	2245	816	366	420	59	1	1	0	1	419919	3909
	Perfect ratio (%)	0.994352	0.978713	0.964347	0.956624	0.931298	0.909091	0.880597	0.2	1	None	1	0.993552	0.951095
	Number of phased	934769	143775	57316	29614	17592	30558	8926	1116	343	0	1086	1225095	146551
	Phased error	2359	256	116	66	45	70	23	16	0	0	0	2951	336
	Unknown joined	64	5	6	0	0	2	0	1	0	0	0	78	9
	Phased error rate (%)	0.00241331	0.00185805	0.00185427	0.00197161	0.00165923	0.00249903	0.00405784	0.0053789	0.0165722	0.00110528	0	0.00240879	0.00229272
	HAHAP (HG004)	-10	10-20	20-30	30-40	40-50	50-100	100-200	200-300	300-400	400-500	>500	All	bin > 20
	Total Case	416675	11093	2543	923	406	472	81	11	4	4	2	432214	4446
	Perfect Case	414436	10836	2467	879	391	427	62	9	2	3	2	429514	4242
	Perfect ratio (%)	0.994627	0.976832	0.970114	0.952329	0.963054	0.904661	0.765432	0.818182	0.5	0.75	1	0.993753	0.954116
	Number of phased	966787	155861	62279	32230	18228	31039	10749	2725	1332	1844	1502	1284576	161928
	Phased error	2309	320	109	75	22	76	44	10	41	1	0	3007	378
	Unknown joined	43	4	1	4	1	5	0	0	0	0	0	58	11
	Phased error rate (%)	0.00241331	0.00185805	0.00185427	0.00197161	0.00165923	0.00249903	0.00405784	0.0053789	0.0165722	0.00110528	0	0.00234085	0.00233437
	WhatsHap (HG002)	-10	10-20	20-30	30-40	40-50	50-100	100-200	200-300	300-400	400-500	>500	All	bin > 20
	Total Case	414650	10790	2369	928	374	480	81	14	5	3	1	429695	4255
	Perfect Case	412027	10433	2226	855	346	412	57	6	2	2	0	426366	3906
	Perfect ratio (%)	0.993674	0.966914	0.939637	0.921336	0.925134	0.858333	0.703704	0.428571	0.4	0.666667	0	0.992253	0.917979
	Number of phased	953979	151734	58370	32401	16775	31505	10781	3353	1756	1329	678	1262661	156948
	Phased error	2465	385	192	127	52	186	96	115	17	3	3	3641	791
	Unknown joined	323	92	41	22	5	21	9	8	2	0	0	523	108
	Phased error rate (%)	0.00241331	0.00185805	0.00185427	0.00197161	0.00165923	0.00249903	0.00405784	0.0053789	0.0165722	0.00110528	0	0.00288359	0.00503989
	WhatsHap (HG003)	-10	10-20	20-30	30-40	40-50	50-100	100-200	200-300	300-400	400-500	>500	All	bin > 20
	Total Case	407693	10235	2320	846	418	466	74	1	2	3	1	422059	4131
	Perfect Case	404764	9899	2181	769	341	395	50	0	1	0	1	418401	3738
	Perfect ratio (%)	0.992816	0.967171	0.940086	0.908983	0.815789	0.847639	0.675676	0	0.5	0	1	0.991333	0.904866
	Number of phased	933272	143758	57101	29436	18733	30750	9898	234	674	1357	1086	1226299	149269
	Phased error	2832	368	184	130	139	167	71	7	1	37	0	3936	736
	Unknown joined	326	75	37	18	15	20	4	1	0	1	0	497	96
	Phased error rate (%)	0.00241331	0.00185805	0.00185427	0.00197161	0.00165923	0.00249903	0.00405784	0.0053789	0.0165722	0.00110528	0	0.00320966	0.0049307
	WhatsHap (HG004)	-10	10-20	20-30	30-40	40-50	50-100	100-200	200-300	300-400	400-500	>500	All	bin > 20
	Total Case	415994	11089	2525	929	415	491	82	12	3	5	3	431548	4465
	Perfect Case	412851	10661	2384	842	379	401	49	7	2	3	1	427580	4068
	Perfect ratio (%)	0.992445	0.961403	0.944158	0.906351	0.913253	0.816701	0.597561	0.583333	0.666667	0.6	0.333333	0.990805	0.911086
	Number of phased	965079	155963	61852	32461	18669	32436	10780	2811	938	2253	2716	1285958	164916
	Phased error	2982	525	185	142	57	239	113	40	46	39	17	4385	878
	Unknown joined	386	78	33	27	8	33	10	1	0	1	1	578	114
	Phased error rate (%)	0.00241331	0.00185805	0.00185427	0.00197161	0.00165923	0.00249903	0.00405784	0.0053789	0.0165722	0.00110528	0	0.00340991	0.00532392
	HapCut2 (HG002)	-10	10-20	20-30	30-40	40-50	50-100	100-200	200-300	300-400	400-500	>500	All	bin > 20
	Total Case	415256	10814	2372	916	375	467	85	11	2	4	0	430302	4232
	Perfect Case	413196	10568	2288	883	356	432	64	8	2	3	0	427800	4036
	Perfect ratio (%)	0.995039	0.977252	0.964587	0.963974	0.949333	0.925054	0.752941	0.727273	1	0.75	None	0.994185	0.953686
	Number of phased	955448	151875	58390	31942	16833	30694	11376	2481	618	1775	0	1261432	154109
	Phased error	2116	327	134	53	45	104	91	25	0	3	0	2898	455
	Unknown joined	67	14	6	5	4	1	7	0	0	0	0	104	23
	Phased error rate (%)	0.00241331	0.00185805	0.00185427	0.00197161	0.00165923	0.00249903	0.00405784	0.0053789	0.0165722	0.00110528	0	0.00229739	0.00295246
	HapCut2 (HG003)	-10	10-20	20-30	30-40	40-50	50-100	100-200	200-300	300-400	400-500	>500	All	bin > 20
	Total Case	408241	10256	2329	844	393	465	67	5	1	0	1	422602	4105
	Perfect Case	405861	10038	2243	801	362	420	55	1	1	0	1	419783	3884
	Perfect ratio (%)	0.99417	0.978744	0.963074	0.949052	0.92112	0.903226	0.820896	0.2	1	None	1	0.993329	0.946163
	Number of phased	934616	143934	57348	29287	17593	30771	8986	1116	343	0	1086	1225080	146530
	Phased error	2476	278	128	66	59	86	34	22	0	0	0	3149	395
	Unknown joined	63	5	6	0	0	2	0	1	0	0	0	77	9
	Phased error rate (%)	0.00241331	0.00185805	0.00185427	0.00197161	0.00165923	0.00249903	0.00405784	0.0053789	0.0165722	0.00110528	0	0.00257044	0.00269569
	HapCut2 (HG004)	-10	10-20	20-30	30-40	40-50	50-100	100-200	200-300	300-400	400-500	>500	All	bin > 20
	Total Case	416640	11105	2541	917	409	475	80	9	6	4	2	432188	4443
	Perfect Case	414239	10830	2461	862	392	422	54	7	2	3	2	429274	4205
	Perfect ratio (%)	0.994237	0.975236	0.968516	0.940022	0.958435	0.888421	0.675	0.777778	0.333333	0.75	1	0.993258	0.946433
	Number of phased	966590	155995	62246	32001	18358	31278	10601	2148	1947	1844	1502	1284510	161925
	Phased error	2501	358	126	93	32	118	79	10	75	1	0	3393	534
	Unknown joined	43	4	1	4	1	5	0	0	0	0	0	58	11
	Phased error rate (%)	0.00241331	0.00185805	0.00185427	0.00197161	0.00165923	0.00249903	0.00405784	0.0053789	0.0165722	0.00110528	0	0.00264147	0.00329782
	The QAN50 in simulation
	HAHAP	All Cases	The cases with size > 20
	HG002	859	4275
	HG003	835	4206
	HG004	880	4398.72
	WhatsHap	All Cases	The cases with size > 20
	HG002	865	4346
	HG003	840	4256
	HG004	885	4459
	HapCut2	All Cases	The cases with size > 20
	HG002	858	4270.18
	HG003	835	4191
	HG004	879	4364.5
